# Supplementary material
Source: Springer Nature journal article supplement (https://www.springermedizin.de/resource/supplementary/12990_2008_142_MOESM11_ESM.pdf/9612662)

### A Drug application sites (PKA)

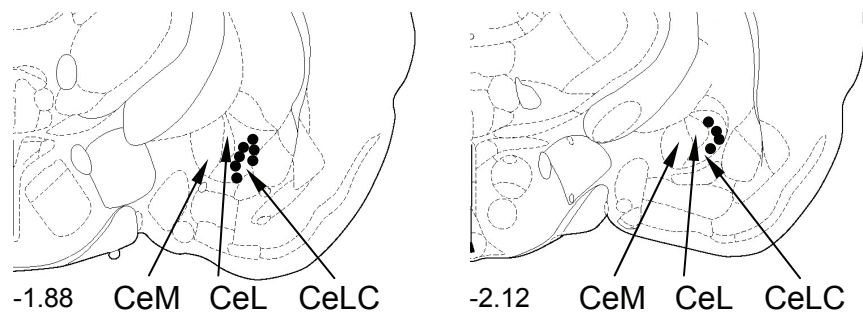

### B Drug application sites (ERK)

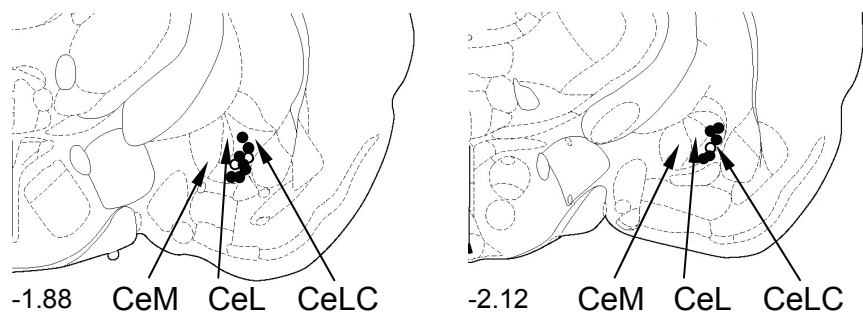

### C Drug application sites (PKC)

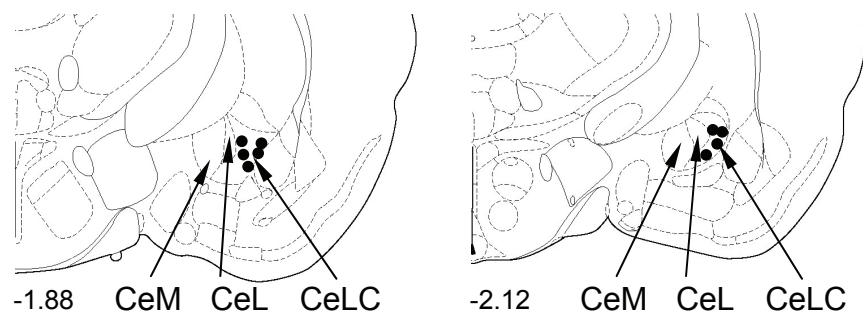

### D Placement controls (PKA and ERK)

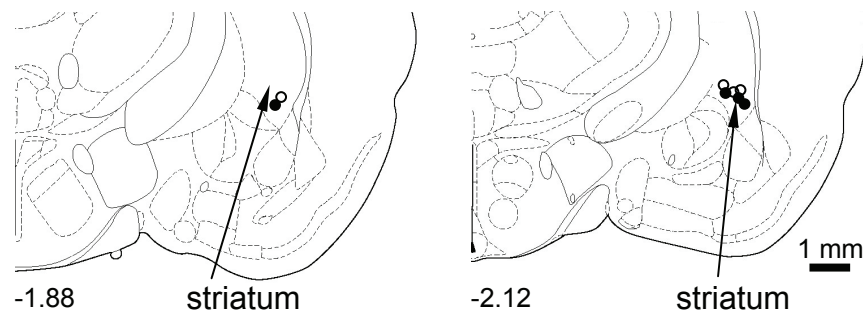

Supplement: MOESM11 [file 9612662]
